# Supplementary material for: Myocardial infarction in the Wisconsin Longitudinal Study: the interaction among environmental, health, social, behavioural and genetic factors
Source: PubMed Central journal article supplement — BMJ Open. 2017 Jan 23;7(1):e011529. doi: 10.1136/bmjopen-2016-011529 (PMC5278299; doi:10.1136/bmjopen-2016-011529), 2017-01-23
Supplement: bmjopen-2016-011529supp.pdf [file bmjopen-2016-011529supp.pdf]

**Supplemental Table 1:** WLS participant response and attrition for survey waves 1993, 2004, and 2011. The number of participants from each survey wave included in the 'MI by 72 Years of Age' analysis, as well as the number of participants who died before each survey wave is included.

| <b>Participant Attrition</b>                       | <b>1993 Survey Wave</b> | <b>2004 Survey Wave</b> | <b>2011 Survey Wave</b> |
|----------------------------------------------------|-------------------------|-------------------------|-------------------------|
| Total participant response to WLS (n =)            | 8493                    | 7265                    | 5968                    |
| Included in 'MI by 72 Years of Age' analysis (n =) | 6013                    | 5757                    | 5939                    |
| Non-respondents who died before survey wave (n =)  | 587                     | 1287                    | 1587                    |
| Attrition from WLS for other reasons (n=)          | 1237                    | 1765                    | 2762                    |

**Supplemental Information 1:** Explanation of WLS variables used to create the two dependent variables for the current study.

This study examined potential MI associated factors using environmental, health, social, behavioral, and genetic data available through the Wisconsin Longitudinal Study (WLS). In order to create our dependent MI variables, we compiled data from the 2004 and 2011 WLS surveys including National Death Index (NDI) data collected by the WLS. The first dependent variable created by this study, 'MI by 72 Years of Age', was coded as "Yes" if a participant answered 'yes' to the question, "Did you have a heart attack or myocardial infarction?" during the 2004 telephone interview, or answered 'yes' to the question, "Did participant ever have a heart attack or myocardial infarction?" during the 2011 in-person or telephone interview, or if the participant ever died of an acute MI according to the National Death Index (ICD-9 or ICD-10 codes; collected by the WLS through 2006 at the time of this study), thereby including anyone who ever reported having a MI to the WLS. The 'MI by 72 Years of Age' dependent variable was coded "No" if the participant answered 'no' to the question, "Has a doctor ever told participant they had a heart attack, coronary heart disease, angina, congestive heart failure, or other heart problems?" during the 2011 survey round, or 'no' to the question, "Did participant ever have a heart attack or myocardial infarction?" during the same survey period. This resulted in MI data for 6,198 graduates, with 776 participants coded as "Yes" and 5,422 coded as "No" for the given MI variable. Additionally, this dependent variable was linked to a dataset which included independent variables collected from all WLS survey years, 1957-2011.

The second dependent variable, 'MI Between 65-72 Years of Age', included ONLY those participants who answered 'no' to the question, "Has a doctor ever told you that you had a heart attack, coronary heart disease, angina, congestive heart failure, or other heart problems?" or answered 'no' to the question, "Did you have a heart attack or myocardial infarction?" during the 2004 telephone interview, and thereby only included those who had not had a MI yet by 2004. The variable was coded as "Yes" if the participant answered 'yes' to the question, "Did participant ever have a heart attack or myocardial infarction?" during the 2011 in-person or telephone interview, or if the participant died of an acute MI after 2004 according to the National Death Index (ICD-9 or ICD-10 codes; collected by the WLS through 2006 at the time of this study). This MI variable was coded "No" if the participant answered 'no' to the question, "Has a doctor ever told participant they had a heart attack, coronary heart disease, angina, congestive heart failure, or other heart problems?" during the 2011 survey round, or 'no' to the question, "Did participant ever have a heart attack or myocardial infarction?" during the same survey period. This resulted in MI data for 5,321 graduates, with 213 participants coded as "Yes" and 5,108 coded as "No" for the given (dependent) MI variable. In addition, this dependent variable was linked to a dataset which included only independent variables collected during the 2004 survey year or earlier.

**Supplemental Information 2:** List of dependent variables, all independent environmental, health, social, and behavioral variables, and additional ApoE genetic variables with current study descriptions and associated WLS coding.

| <u>Variable Description, Survey Year</u>           | <u>WLS variable code</u> |
|----------------------------------------------------|--------------------------|
| <u>Used to create Dependent Variables</u>          |                          |
| Year of Death                                      | deatyr                   |
| Cause of Death                                     | ndi02                    |
| Myocardial Infarction, 2004                        | *gx351re & gx352re       |
| Myocardial Infarction, 2011                        | *hx351re & hx352re       |
| <u>Independent Variables</u>                       |                          |
| Sex                                                | sexrsp                   |
| Age (current)                                      | brxdy                    |
| IQ (Henmon-Nelson test score), 1957                | gwiiq_bm                 |
| Number of Children, 1993                           | rd001kd                  |
| Number of Children, 2004                           | gd001kd                  |
| Number of Children, 2011                           | hd001kd                  |
| Deceased Child, 2004                               | gd102kd                  |
| Not Married, 1993                                  | rc001re                  |
| Not Married, 2004                                  | gc001re                  |
| Not Married, 2011                                  | hc001re                  |
| Total Household Income, 2004                       | gp260hec                 |
| Total Household Income, 2011                       | hp260hec                 |
| Importance of Financial Situation, 1993            | rb036re                  |
| Satisfied with Financial Situation, 2004           | gp226re                  |
| Satisfied with Financial Situation, 2011           | hp226re                  |
| Parent or Sibling Heart Attack before age 55, 2004 | ixa06rec                 |
| Parent or Sibling Heart Attack after age 55, 2004  | ixa07rec                 |
| High Cholesterol, 2004                             | ix146rer                 |
| High Cholesterol, 2011                             | jx146rer                 |
| Parent or Sibling High Cholesterol, 2004           | ixa03rec                 |
| High Blood Pressure, 1993                          | mx101rer                 |
| High Blood Pressure, 2004                          | gx341re                  |
| High Blood Pressure, 2011                          | hx341re                  |
| Osteoporosis, 2004                                 | ix150rer                 |
| Osteoporosis, 2011                                 | jx150rer                 |
| Parent or Sibling Osteoporosis, 2004               | ixa11rec                 |
| Stroke, 2004                                       | gx356re                  |
| Stroke, 2011                                       | hx356re                  |
| Parent or Sibling Stroke before age 65, 2004       | ixa04rec                 |
| Parent or Sibling Stroke after age 65, 2004        | ixa05rec                 |
| Diabetes, 1993                                     | mx095rer                 |
| Diabetes, 2004                                     | gx342re                  |
| Diabetes, 2011                                     | hx342re                  |
| Parent or Sibling Diabetes, 2004                   | ixa08rec                 |
| Parent or Sibling Alzheimer's Disease, 2004        | ixa09rec                 |
| Ever Smoked Cigarettes, 1993                       | mx012rer                 |
| Ever Smoked Cigarettes, 2004                       | ix012rer                 |

**Variable Description, Survey Year**

Ever Smoked Cigarettes, 2011

Years Smoked, 1993

Years Smoked, 2004

Years Smoked, 2011

Packs/Day Smoked, 1993

Packs/Day Smoked, 2004

Packs/Day Smoked, 2011

Pack-Years Smoked, 1993

Pack-Years Smoked, 2004

Pack-Years Smoked, 2011

Ever Smoked Pipe, Cigars, or used Snuff or  
Chewing Tobacco Regularly, 2004

Body Mass Index, 1993

Body Mass Index, 2004

Body Mass Index, 2011

Age Weighed Most, 2004

Age Weighed Most, 2011

Overweight, Underweight, or Right Weight, 2004

Overweight, Underweight, or Right Weight, 2011

Using Exercise to Lose or Maintain Weight, 2004

Using Exercise to Lose or Maintain Weight, 2011

Most Ever Weighed, 2004

Most Ever Weighed, 2011

Hours/Month Light Activity, Alone or with Others, 2004

Hours/Month Vigorous Activity, Alone or with Others, 2004

Hours/Month Light Activity Alone, 2004

Hours/Month Light Activity Alone, 2011

Hours/Month Light Activity with Others, 2004

Hours/Month Light Activity with Others 2011

Light Activity Alone 10 Years Ago, 2004

Light Activity Alone 5 Years Ago, 2011

Light Activity with Others 10 Years Ago, 2004

Light Activity with Others 5 Years Ago, 2011

Light Activity Alone when 35, 2004

Light Activity with Others when 35, 2004

Hours/Month Vigorous Activity Alone, 2004

Hours/Month Vigorous Activity Alone, 2011

Hours/Month Vigorous Activity with Others, 2004

Hours/Month Vigorous Activity with Others, 2011

Vigorous Activity Alone 10 Years Ago, 2004

Vigorous Activity Alone 5 Years Ago, 2011

Vigorous Activity with Others 10 Years Ago, 2004

Vigorous Activity with Others 5 Years Ago, 2011

Vigorous Activity Alone when 35, 2004

Vigorous Activity with Others when 35, 2004

Hours/Week Watch T.V., 2004

Hours/Week Watch T.V., 2011

**WLS variable code**

jx012rer

\*mx012rer &amp; mx014rer

\*ix012rer &amp; ix014rer

\*jx012rer &amp; jx014rer

\*mx012rer &amp; mx015rer

\*ix012rer &amp; ix015rer

\*jx012rer &amp; jx015rer

\*mx012rer &amp; mx014rer

&amp; mx015rer

\*ix012rer &amp; ix014rer

&amp; ix015rer

\*jx012rer &amp; jx014rer

&amp; jx015rer

ixt01rer

mx011rec

ix011rec

jx011rec

ixw02rer

jxw02rer

ixw05rer

jxw05rer

ixw08rer

jxw08rer

ixw01rer

jxw01rer

ixe01rer

ixe02rer

iz165rer

jz165rer

iz168rer

jz168rer

iz166rer

jz166rer

iz169rer

jz169rer

iz167rer

iz170rer

iz171rer

jz171rer

iz174rer

jz174rer

iz172rer

jz172rer

iz175rer

jz175rer

iz173rer

iz176rer

iz108rer

jz108rer

**Variable Description, Survey Year**

How often Watched T.V. 10 Years Ago, 2004

How often Watched T.V. when 35, 2004

How often Watched T.V. 5 Years Ago, 2011

Person in Family to Share Feelings and Concerns, 1993

Person in Family to Share Feelings and Concerns, 2004

Person in Family to Share Feelings and Concerns, 2011

Friend Outside Family to Share Feelings and Concerns, 1993

Friend Outside Family to Share Feelings and Concerns, 2004

Friend Outside Family to Share Feelings and Concerns, 2011

Trouble Sleeping in Past 6 Months, 1993

Trouble Sleeping in Past 6 Months, 2004

Days/Week Sleep Restlessly, 1993

Days/Week Sleep Restlessly, 2004

Days/Week Sleep Restlessly, 2011

Hours of Sleep on a Weekday, 2011

Worry a Lot, 1993

Worry a Lot, 2004

Worry a Lot, 2011

Feel Confident and Positive about Yourself, 1993

Feel Confident and Positive about Yourself, 2004

Feel Confident and Positive about Yourself, 2011

Created Lifestyle to Your Liking, 1993

Created Lifestyle to Your Liking, 2004

Created Lifestyle to Your Liking, 2011

Days/Week Feel Fearful, 1993

Days/Week Feel Fearful, 2004

Days/Week Feel Fearful, 2011

Days/Week Feel Relaxed, 2004

Days/Week Feel Relaxed, 2011

Are Relaxed and Handle Stress Well, 1993

Summary Score Spielberger Anger Index, 2004

Summary Score Spielberger Anger Index, 2011

Summary Score Hostility Index, 2004

Summary Score Spielberger Anxiety Index, 2004

Summary Score Spielberger Anxiety Index, 2011

Summary Score Psychological Well-Being, 1993

Summary Score Distress/Depression, 1993

Summary Score Distress/Depression, 2004

Summary Score Distress/Depression, 2011

Days/Week Feel Depressed, 1993

Days/Week Feel Depressed, 2004

Days/Week Feel Depressed, 2011

Ever Drank Alcohol, 1993

Ever Drank Alcohol, 2004

Ever Drank Alcohol, 2011

Days/Month Drink Alcohol, 1993

Days/Month Drink Alcohol, 2004

Days/Month Drink Alcohol, 2011

Drinks/Day on Days Drank Alcohol, 1993

Drinks/Day on Days Drank Alcohol, 2004

**WLS variable code**

iz109rer

iz110rer

jz109rer

mv053rer

iv053rer

jv053rer

mv054rer

iv054rer

jv054rer

mx019rer

ix019rer

mu020rer

iu020rer

ju020rer

jxsl11re

mh029rer

ih029rer

jh029rer

mn049rer

in049rer

jn049rer

mn017rer

in017rer

jn017rer

mu019rer

iu019rer

ju019rer

iu047rer

ju047rer

rh020re

iuc34rec

jua34rec

iu026rec

iua33rec

jua33rec

rn014rei

mu001rec

iu001rec

ju001rec

mu013rer

iu013rer

ju013rer

ru025re

gu025re

hu025re

\*ru025re &amp; ru026re

\*gu025re &amp; gu026re

\*hu025re &amp; hu026re

\*ru025re &amp; ru027re

\*gu025re &amp; gu027re

**Variable Description , Survey Year**

Drinks/Day on Days Drank Alcohol, 2011  
Alcoholic Drinks/Month, 1993  
Alcoholic Drinks/Month, 2004  
Alcoholic Drinks/Month, 2011  
Days/Month Drank 5+ Alcoholic Drinks/Day, 1993  
Days/Month Drank 5+ Alcoholic Drinks/Day, 2004  
Days/Month Drank 5+ Alcoholic Drinks/Day, 2011  
Family Worries Distract from Work, 1993  
Family Worries Distract from Work, 2004  
Summary Score Family Stress at Work, 1993  
Job Worries Distract You at Home, 2004  
How Often You Found Work Stressful, 2004  
How Often You Found Work Stressful, 2011  
Dangerous Conditions at Work, 1993  
Dangerous Conditions at Work, 2004  
Dangerous Conditions at Work, 2011  
Frequency Working under Pressure of Time, 1993  
Frequency Working under Pressure of Time, 2004  
Frequency Working under Pressure of Time, 2011  
Authority to Hire and Fire Others at Work, 1993  
Authority to Hire and Fire Others at Work, 2004  
Authority to Hire and Fire Others at Work, 2011  
Frequency Work Required Physical Effort, 1993  
Frequency Work Required Physical Effort, 2004  
Frequency Work Required Physical Effort, 2011  
Hours/Week Working on Computer, 2004  
Hours/Week Working on Computer, 2011  
Total Years of College, 1975  
Total Years of College, 1993  
Your Situation Compared to Others in America, 2004  
Your Situation Compared to Others in Your Community, 2004  
Close Friend Ever Died, 2004  
Close Friend Ever Died, 2011  
Parent Drug Abuse Caused Problems for Family, 2004  
Sibling Ever Physically Abused You, 2004  
Experienced Life-Threatening Disaster, 2004  
Experienced Life-Threatening Disaster, 2011  
Child or Grandchild Served in Combat, 2011  
You Served in War or Combat, 2004  
Witnessed Severe Injury or Death, 2004  
Witnessed Severe Injury or Death, 2011  
Ever Gone Deeply into Debt, 2004  
Ever Gone Deeply into Debt, 2011  
Child Ever Gone Deeply into Debt, 2011  
Ever had Serious Legal Difficulties, 2004  
Ever had Serious Legal Difficulties, 2011  
Ever been in Jail or Prison, 2004  
Ever been in Jail or Prison, 2011  
Spouse Ever Physically Abused You, 2004  
Spouse Ever Physically Abused You, 2011

**WLS variable code**

\*hu025re & hu027re  
\*ru025re & ru028re  
\*gu025re & gu028re  
\*hu025re & hu028re  
\*ru025re & ru029re  
\*gu025re & gu029re  
\*hu025re & hu029re  
my004rer  
iy004rer  
my001rei  
ig309rer  
gg201jj  
hg201jj  
rg054jjc  
gg054jjc  
hg054jjc  
rg048jjc  
gg048jjc  
hg048jjc  
rg028jjf  
gg028jjf  
hg028jjf  
rg046jjc  
gg046jjc  
hg046jjc  
gg204jj  
hg204jj  
edyrcm  
rb002rec  
ig301rer  
ig302rer  
id001cre  
jd001cre  
id002cre  
id003cre  
id004cre  
jd004cre  
jd050cre  
id005cre  
id006cre  
jd006cre  
id007cre  
jd007cre  
jd070cre  
id008cre  
jd008cre  
id009cre  
jd009cre  
id010cre  
jd010cre

| <b><u>Variable Description, Survey Year</u></b>                | <b><u>WLS variable code</u></b> |
|----------------------------------------------------------------|---------------------------------|
| Child Ever been Divorced, 2004                                 | id011cre                        |
| Child Ever been Divorced, 2011                                 | jd011cre                        |
| Child Ever had Life-Threatening Illness or Accident, 2004      | id012cre                        |
| Child Ever had Life-Threatening Illness or Accident, 2011      | jd012cre                        |
| Grandchild Ever had Life-Threatening Illness or Accident, 2011 | jd120cre                        |
| Adult Child Ever Moved Back Home, 2004                         | id013cre                        |
| Adult Child Ever Moved Back Home, 2011                         | jd013cre                        |
| Ever had Increased Responsibility for Grandchildren, 2004      | id014cre                        |
| Ever had Increased Responsibility for Grandchildren, 2011      | jd014cre                        |
| Aging Parent or In-law Ever Moved into Your Home, 2004         | id015cre                        |
| Aging Parent or In-law Ever Moved into Your Home, 2011         | jd015cre                        |
| Ever Placed Spouse, Parent, or In-law into Nursing Home, 2004  | id016cre                        |
| Ever Placed Spouse, Parent, or In-law into Nursing Home, 2011  | jd016cre                        |
| Ever Seriously Thought about Taking Your Own Life, 2004        | id017cre                        |
| Ever Seriously Thought about Taking Your Own Life, 2011        | jd017cre                        |
| When Stressed Turn to Work, 2004                               | id101rer                        |
| When Stressed Turn to Work, 2011                               | jd101rer                        |
| When Stressed Concentrate Your Efforts, 2004                   | id102rer                        |
| When Stressed Concentrate Your Efforts, 2011                   | jd102rer                        |
| When Stressed Pretend it's Not Real, 2004                      | id103rer                        |
| When Stressed Pretend it's Not Real, 2011                      | jd103rer                        |
| When Stressed Give up Trying to Deal, 2004                     | id104rer                        |
| When Stressed Give up Trying to Deal, 2011                     | jd104rer                        |
| When Stressed Say Things to let Negative Feelings Go, 2004     | id107rer                        |
| When Stressed Say Things to let Negative Feelings Go, 2011     | jd107rer                        |
| When Stressed Try to Make Situation Positive, 2004             | id108rer                        |
| When Stressed Try to Make Situation Positive, 2011             | jd108rer                        |
| When Stressed Criticize Yourself, 2004                         | id109rer                        |
| When Stressed Criticize Yourself, 2011                         | jd109rer                        |
| When Stressed Try to Think About it Less, 2004                 | id113rer                        |
| When Stressed Try to Think About it Less, 2011                 | jd113rer                        |
| When Stressed Express Negative Feelings, 2004                  | id115rer                        |
| When Stressed Express Negative Feelings, 2011                  | jd115rer                        |
| When Stressed Learn to Live with It, 2004                      | id116rer                        |
| When Stressed Learn to Live with It, 2011                      | jd116rer                        |
| When Stressed Think Hard about Steps to Take, 2004             | id117rer                        |
| When Stressed Think Hard about Steps to Take, 2011             | jd117rer                        |
| When Stressed Blame Yourself, 2004                             | id118rer                        |
| When Stressed Blame Yourself, 2011                             | jd118rer                        |
| Summary Score Extraversion, 1993                               | mh001rei                        |
| Summary Score Extraversion, 2004                               | ih001rei                        |
| Summary Score Extraversion, 2011                               | jh001rei                        |
| Summary Score Openness, 1993                                   | mh032rei                        |
| Summary Score Openness, 2004                                   | ih032rei                        |
| Summary Score Openness, 2011                                   | jh032rei                        |
| Summary Score Neuroticism, 1993                                | mh025rei                        |
| Summary Score Neuroticism, 2004                                | ih025rei                        |
| Summary Score Neuroticism, 2011                                | jh025rei                        |
| Summary Score Conscientiousness, 1993                          | mh017rei                        |
| Summary Score Conscientiousness, 2004                          | ih017rei                        |

**Variable Description, Survey Year**

Summary Score Conscientiousness, 2011  
Summary Score Agreeableness, 1993  
Summary Score Agreeableness, 2004  
Summary Score Agreeableness, 2011

**WLS variable code**

jh017rei  
mh009rei  
ih009rei  
jh009rei

**Female-Specific Variables**

Age First Menstruated, 2004  
Menstruated in Last 12 Months, 1993  
Age Last Menstruated, 1993  
Age Last Menstruated, 2004  
Gone through Menopause, 1993  
Taken Hormones for Menopausal Symptoms, 1993  
Taken Hormones for Menopausal Symptoms, 2004  
Stopped Menstruating before Taking  
Hormones for Menopausal Symptoms, 2004  
Age taking First Hormone for Menopausal Symptoms, 1993  
First Hormone for Menopausal Symptoms, 1993  
Still taking First Hormone for Menopausal Symptoms, 1993  
Age Stopped First Hormone for Menopausal Symptoms, 1993  
Ever Stopped taking Hormones for Menopausal Symptoms, 2004  
Age Stopped taking Hormones for Menopausal Symptoms, 2004  
Age Stopped taking Estrogen and Progesterone  
for Menopausal Symptoms, 2004  
Age Stopped taking Testosterone for Menopausal Symptoms, 2004  
Menopausal Symptoms when Stopped taking Hormones, 2004  
Ever had Surgery to Remove Uterus and/or Ovaries, 1993  
Ever had Surgery to Remove Uterus and/or Ovaries, 2004  
Age had Surgery to Remove Uterus and/or Ovaries, 1993  
Ever had Surgery to Remove Uterus, 2004  
Age had Surgery to Remove Uterus, 2004  
Ever had Surgery to Remove One of Your Ovaries, 2004  
Age had Surgery to Remove One of Your Ovaries, 2004  
Ever had Surgery to Remove Both of Your Ovaries, 2004  
Age had Surgery to Remove Both of Your Ovaries, 2004

in190rer  
mn119rer  
mn120rer  
in120rer  
mn121rer  
mn125rer  
in125rer  
  
in209rer  
mn147rec  
mn150rec  
mn149rec  
mn148rec  
in222rer  
in223rer  
  
in134rer  
in207rer  
in235rer  
mn122rer  
in122rer  
mn124rer  
in123cre  
in124are  
in123bre  
in124cre  
in123are  
in124bre

**Genetic (SNP) Related Variables**

Genotype is Allele ApoE4 +/-  
Genotype is Allele ApoE2 +/-  
Genotype for ApoE is E4/E4  
Genotype for ApoE is E2/E2  
Participant Genotype for ApoE

\*rs429358 & rs7412  
\*rs429358 & rs7412  
\*rs429358 & rs7412  
\*rs429358 & rs7412  
\*rs429358 & rs7412

---

\* Variable created by combining existing WLS variables.



**Supplemental Information 3:** Description of statistics showing sex as one of the top MI associated factors among WLS participants.

All analyses identified sex as one of the factors most associated with MI among WLS participants. Recursive partitioning showed that among those who ever had a MI by 72 years old, with all participants combined (males and females) the second highest factor associated with MI was sex, with prevalence among males in the WLS cohort at 13.1% and among females at 4.9% (OR=2.94, 95% CI= 2.38-3.63; tree not shown). Among those who experienced their MI between 65-72 years old, RP revealed that the top factor for MI was sex, with prevalence among males at 5.9% and among females at 2.5% (2.46, 1.84-3.29; tree not shown). In addition, RF selected sex as one of the 'important' MI associated factors for those who ever experienced a MI before 72 and as the most 'important' factor for those having a MI between 65-72 years (not shown). Finally, both LR and  $X^2$  analyses identified sex as a significant factor for MI at any age (p-values <0.0001), with males in the WLS cohort more likely to have had a MI than females by 72 (2.75, 2.34-3.23) and between 65-72 (2.46, 1.84-3.29). Males and females were therefore analyzed separately throughout this study.

**Supplemental Information 4:** List of 'Important' MI associated factors by RF, for males who ever had a MI up to age 72 years in the WLS cohort.

## 'MI by 72 Years of Age' Random Forest Important Variables for Males

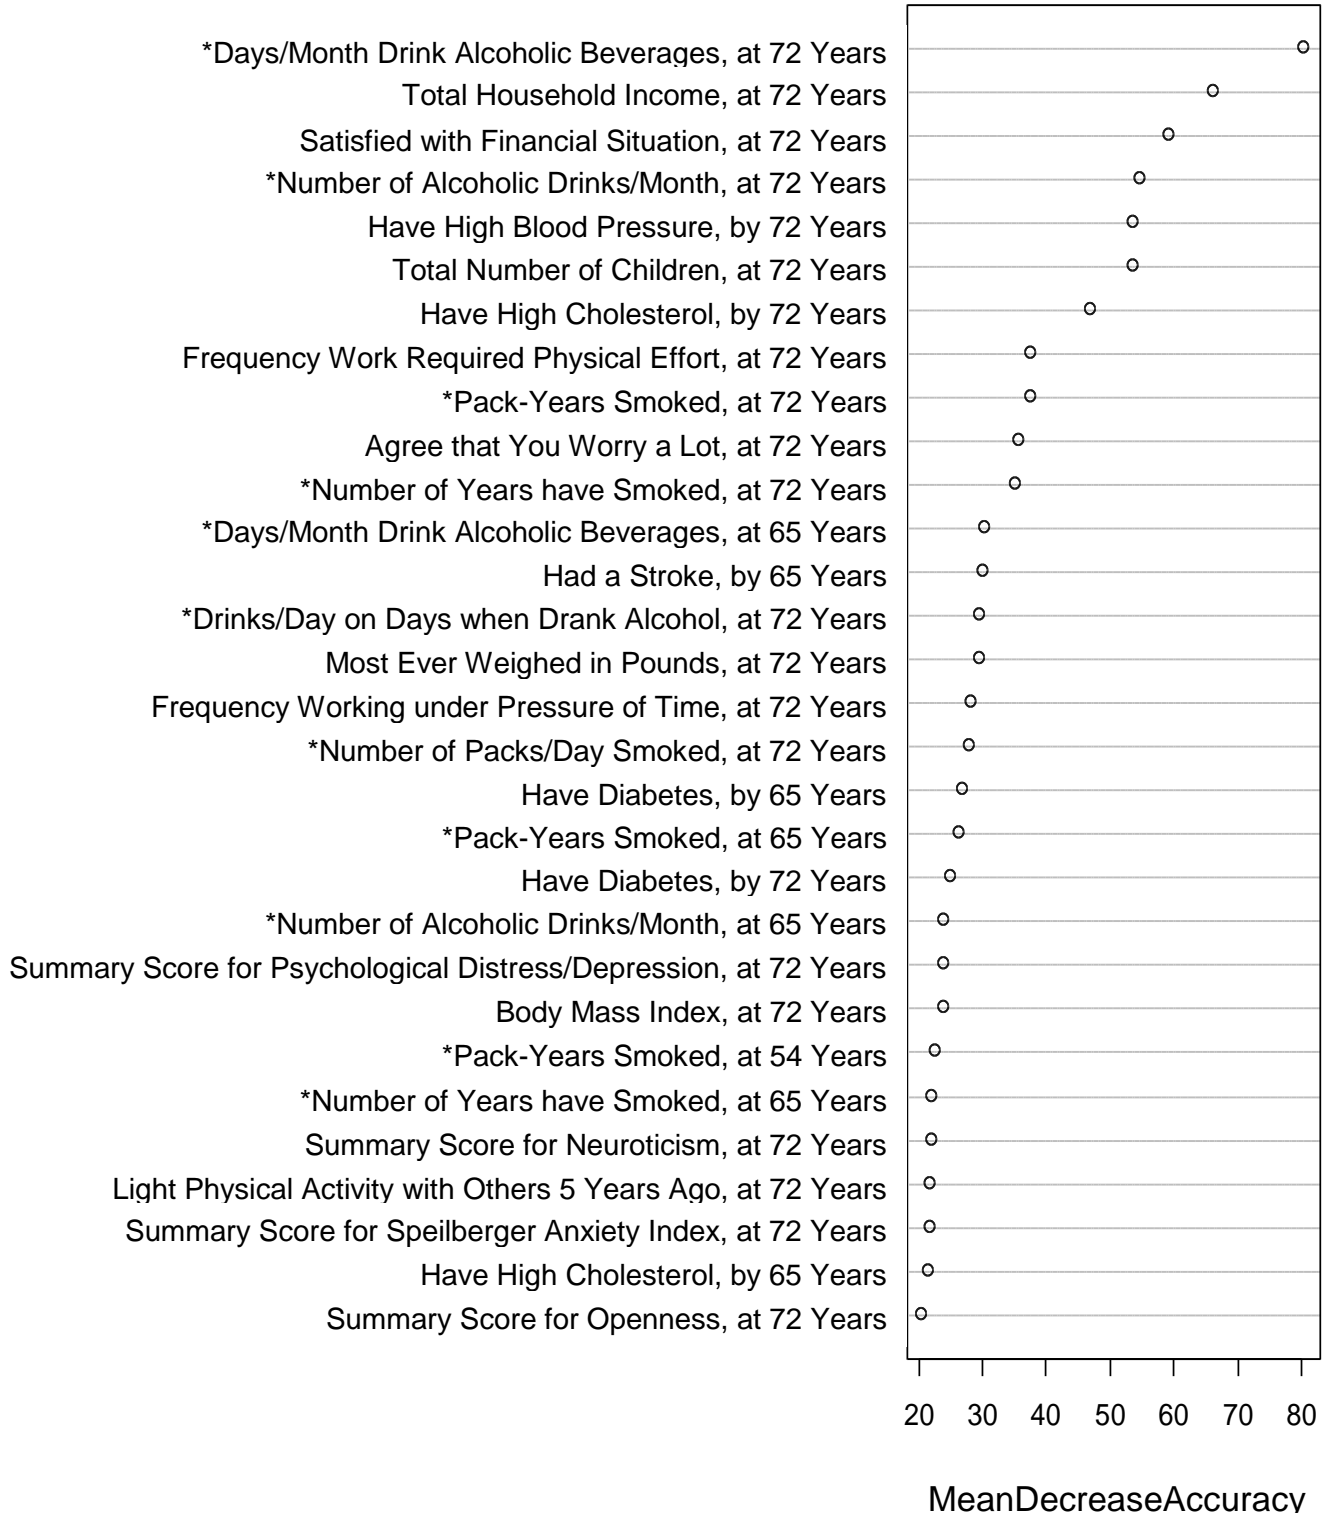

\* = Variable created by combining existing WLS variables

**Supplemental Information 5:** List of ‘Important’ MI associated factors by RF, for males who had a MI between 65-72 years of age in the WLS cohort.

## ‘MI Between 65-72 Years of Age’ Random Forest Important Variables for Males

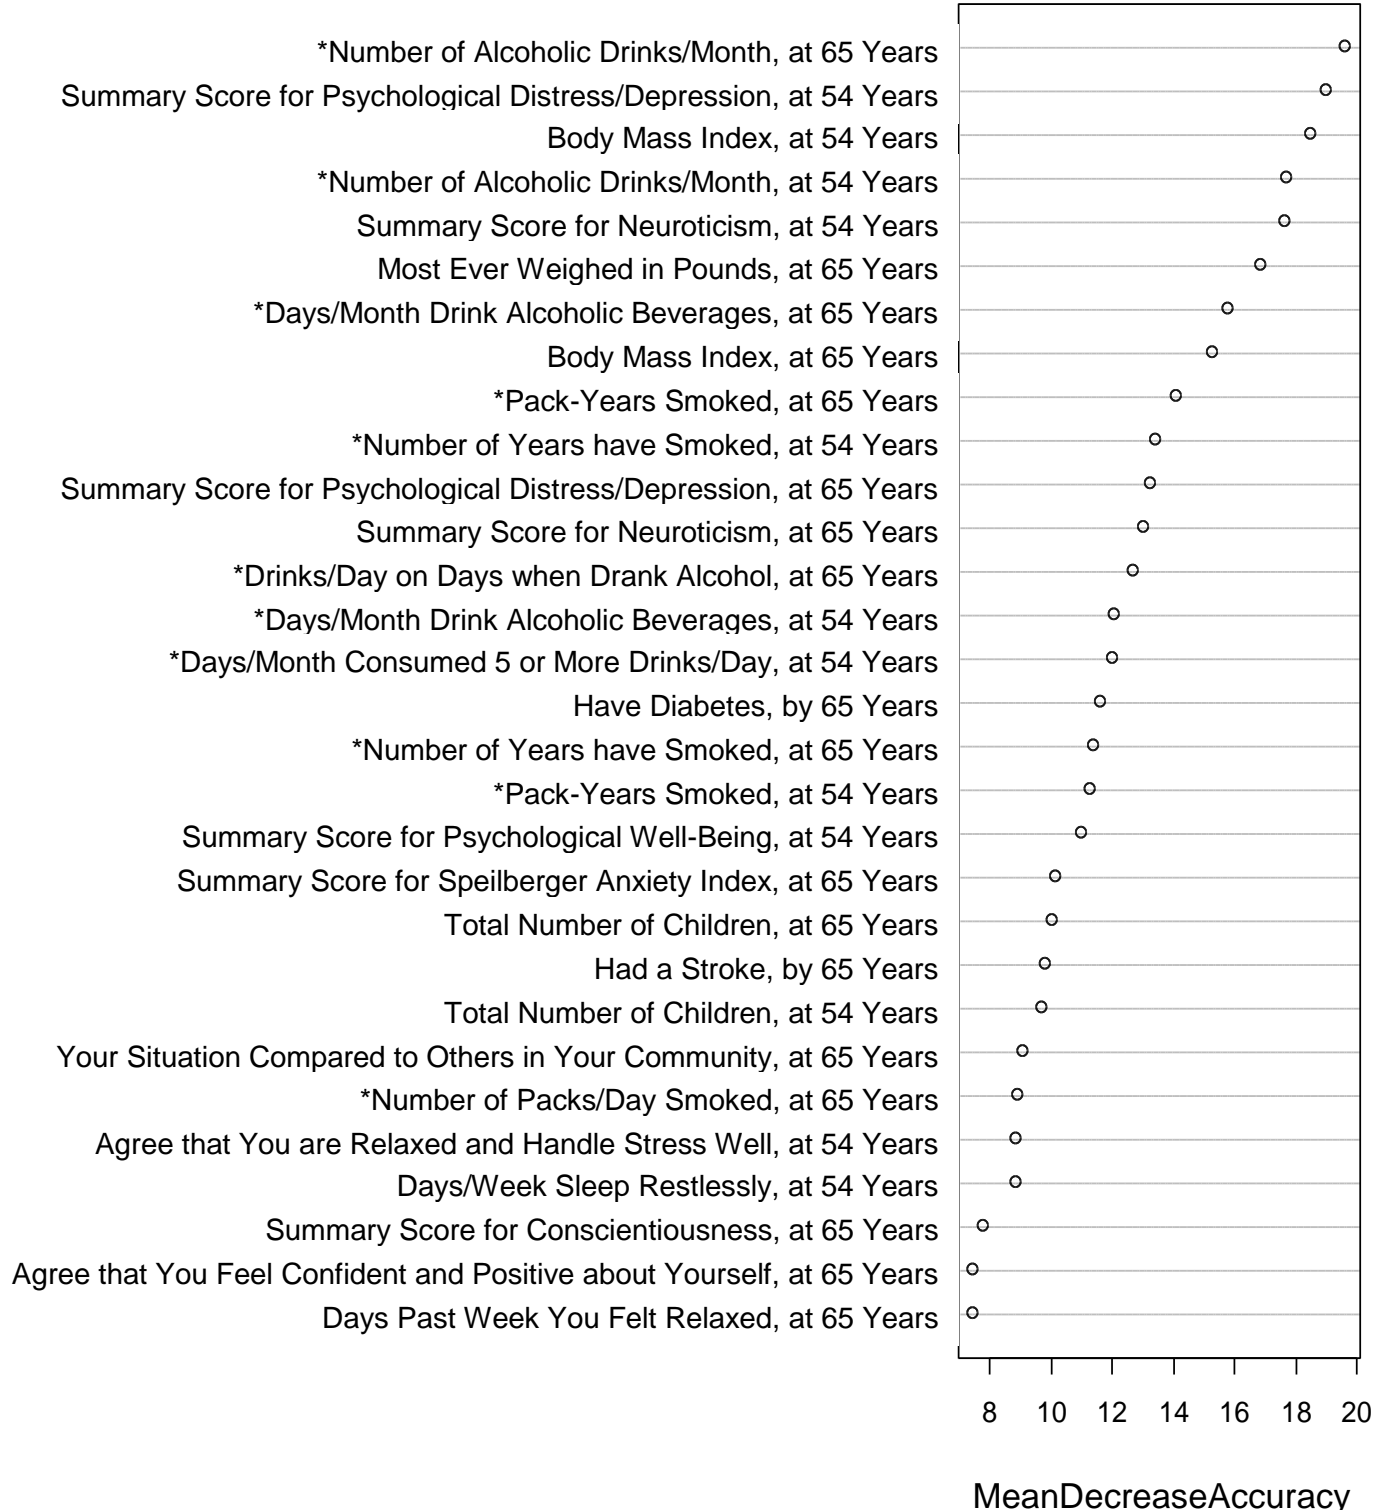

\* = Variable created by combining existing WLS variables

**Supplemental Information 6:** List of 'Important' MI associated factors by RF, for females who ever had a MI up to age 72 years in the WLS cohort.

## 'MI by 72 Years of Age' Random Forest Important Variables for Females

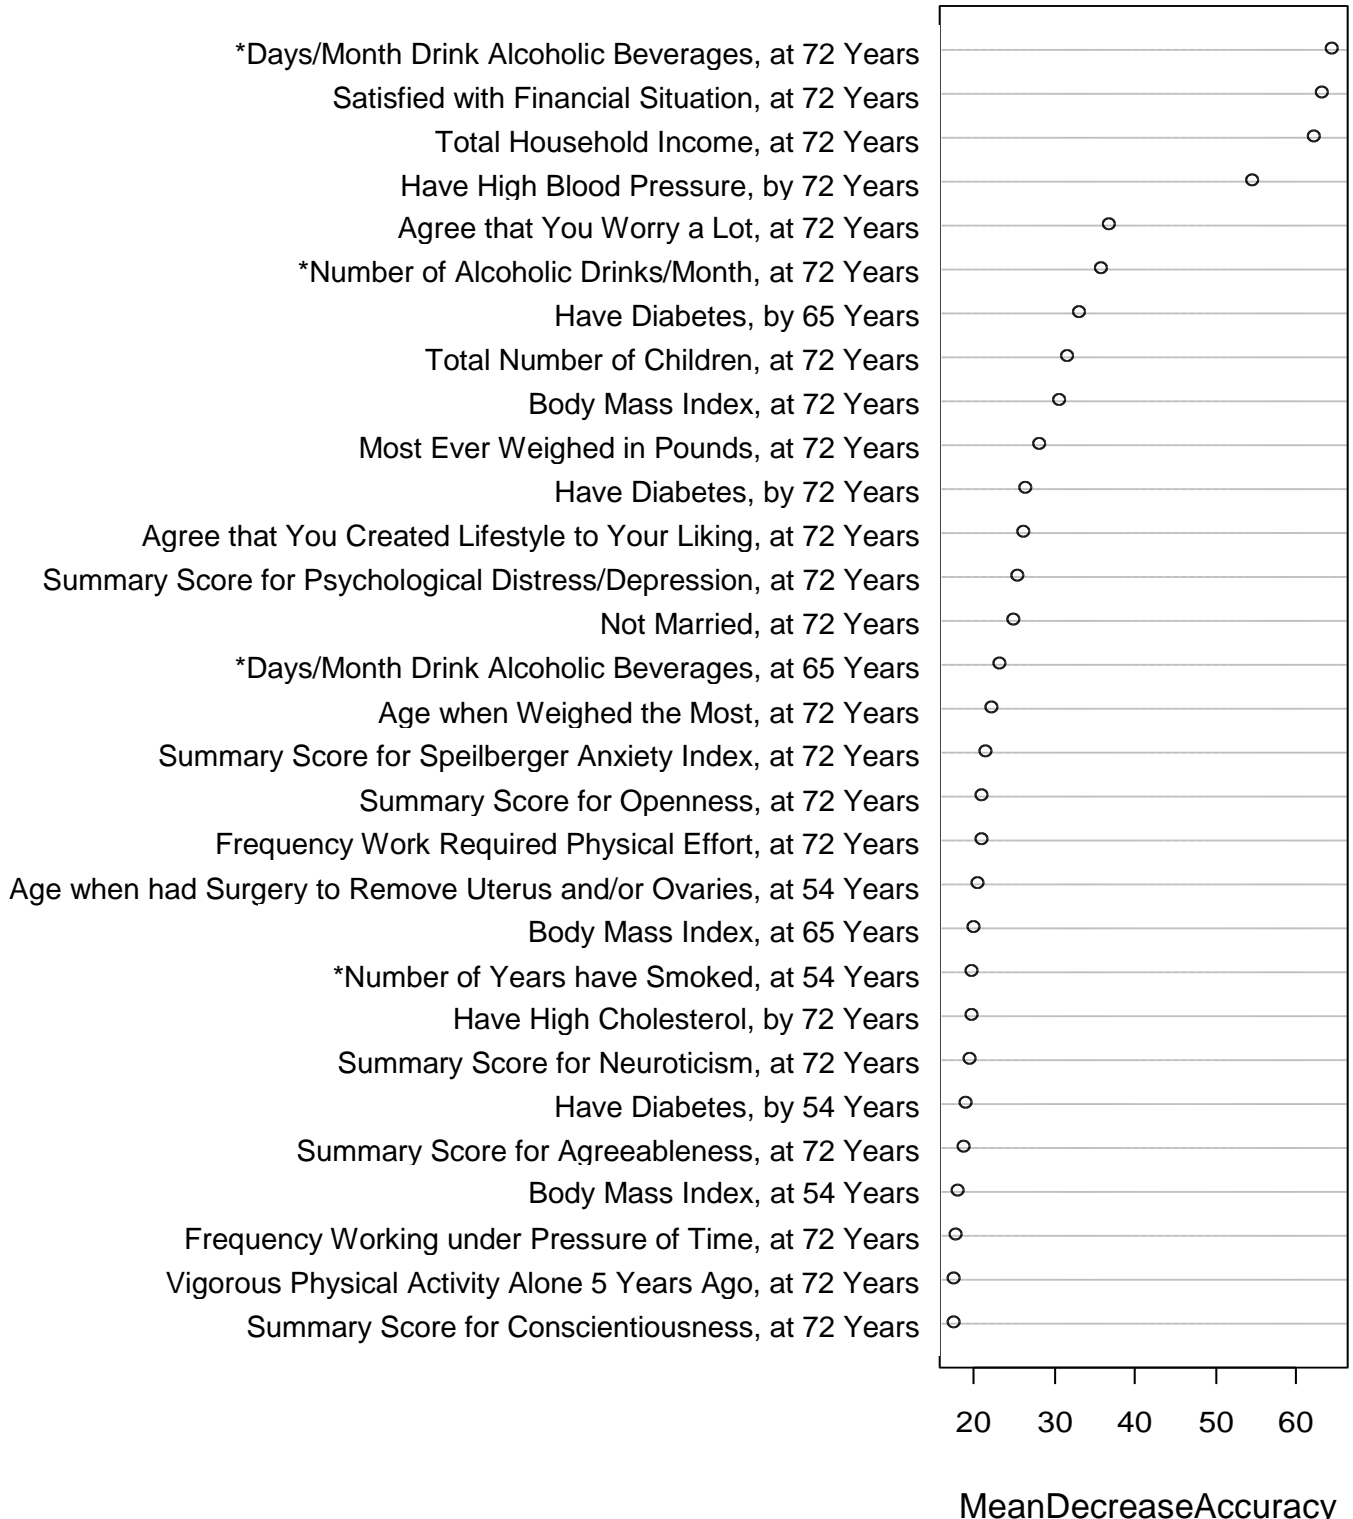

\* = Variable created by combining existing WLS variables

**Supplemental Information 7:** List of 'Important' MI associated factors by RF, for females who had a MI between 65-72 years of age in the WLS cohort.

## 'MI Between 65-72 Years of Age' Random Forest Important Variables for Females

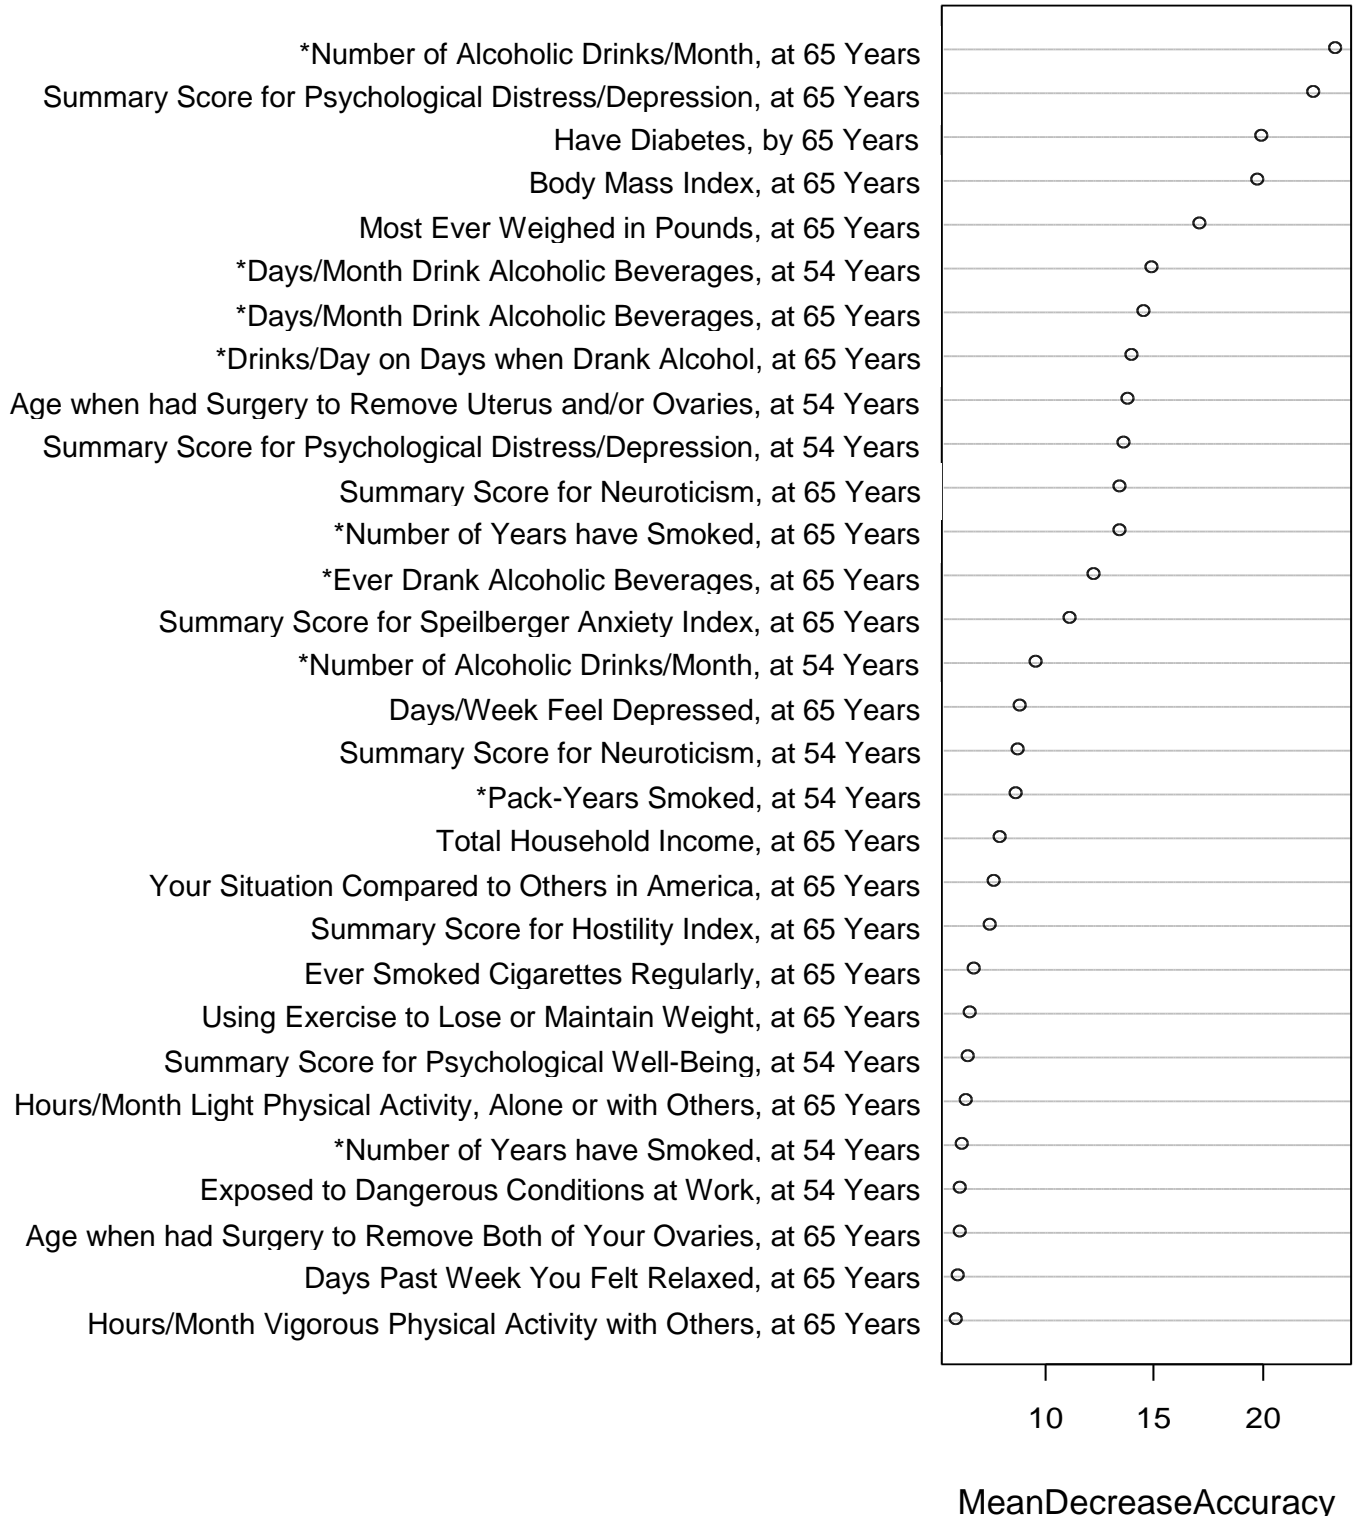

\* = Variable created by combining existing WLS variables

**Supplemental Information 8:** Additional discussion of recursive partitioning results for males who ever had a MI before age 72 in the WLS cohort.

Recursive partitioning (RP) analysis revealed that the most important interactive effects among factors associated with MI for males in the WLS who ever had a MI before age 72 were first having high cholesterol, then having diabetes, both by 65 years old, and the number of years smoked by 54 years old (see Figure 1). Beyond these interactions, for those with no high cholesterol or diabetes by 65 years, depression becomes an important factor associated with MI and then high cholesterol by 72 years and high blood pressure by 65 years old, and finally, how many alcoholic drinks were consumed each month at 72. For those with no high cholesterol by 65 years old, each of the additional factors listed above demonstrates at least a 3-fold increase in MI prevalence at each split (node) in the tree. For those who had no high cholesterol, no diabetes, and no (limited) depression by 65 years old, the next MI associated factor was having high cholesterol by 72 years old, although this factor was associated with lower MI prevalence than the preceding factors (2.4% versus 8.6%; see Figure 1). This result is supported by studies showing that the key risk factors for MI become less predictive the older we get<sup>1,2</sup>. That is because the risk for MI increases as we age due to the 'natural' progression of atherosclerosis and narrowing of arteries in the elderly<sup>3-5</sup>. However, for those with high cholesterol by 72 years, consuming more than 5.5 alcoholic drinks per month cut MI prevalence by nearly half and drinking less than 5.5 alcoholic drinks per month was associated with a 3.1-fold increase in the prevalence of MI, supporting results from previous studies (see main text). For those who had no high cholesterol but did have diabetes by 65 years, openness becomes an important factor, with low prevalence among those who were less open and much higher prevalence (9.2-fold increase) among those who were more open (2.9% versus 26.7% respectively). Counter to our results, previous studies have demonstrated an inverse relationship between openness and heart disease risk/mortality<sup>6-8</sup>; therefore, further study should attempt to elucidate this relationship. For those with a higher openness score at 65, MI prevalence is mediated by their genotype at the CYP11B2 gene (rs1799998 SNP). Our study revealed a much higher prevalence of MI among those with the A:G or G:G genotype (30.6%) compared to no prevalence among those with an A:A genotype (0.0%). This is among those males who before the CYP11B2 SNP measurement had an overall MI prevalence of 26.7% (Figure 1). This finding suggests that the A:A homozygous genotype confers a protective effect against MI, supported by studies showing that having a G allele at this polymorphism site is significantly associated with coronary heart disease or its risk factors<sup>9-13</sup>. However, conflicting results in the literature suggest that further study is needed to confirm the association and to determine possible interactions between this SNP and other MI risk factors<sup>14-19</sup>.

In addition to the interactions listed above, for those who do have high cholesterol by 65 years, the number of years smoking cigarettes by 54 years, days/month drinking alcohol, dangerous conditions at work, and genotype at the FADS2 gene polymorphism become important interactive associations (see Figure 1). Smoking fewer than 22.5 years by 54 years old interacts with having diabetes by 65 years, a familial history of MI, family worries at work, the most ever weighed, number of years of college completed, total household income, and genotype at the IL6 gene polymorphism site. Among those with high cholesterol by 65 years old who have smoked more than 22.5 years, regular moderate alcohol consumption seems to provide an insulating effect against MI, with a 3.8-fold increase in prevalence of MI among those who drank less than 24.5 days/month (40.9% versus 10.7%; Figure 1). This relationship is mediated by experiencing dangerous conditions in the workplace (at 65 years), with a 2.6-fold increase among those who work under dangerous conditions and half of the men in this group experiencing MI at some point in their lives (50% versus 19.4%). This supports the assertion that this factor may represent a 'new' MI risk, as stated in the main text. For those experiencing no dangerous conditions at work, prevalence increases by having a C:G or G:G genotype at the FADS2 gene polymorphism (rs174575) site, resulting in a 6.6-fold increase in MI prevalence over those with the homozygous C:C genotype (46.7% versus 7.1%). Although one study was identified in which this polymorphism was analyzed against coronary artery disease risk, no association was found<sup>20</sup>. Further study is needed to determine if this gene locus is indeed associated with MI, as supported by this study. Among those who had high cholesterol by 65 years, smoked less than 22.5 years by 54 years, and did not have diabetes by 65 years, a familial history of MI (before age 55) was the next interactive factor associated with MI, with a 3.1-fold increase in prevalence among men in this group (31.5% versus 10.3%; Figure 1).

For those with no familial history of MI, the most ever weighed becomes an important factor with a 3.4-fold increase in prevalence among those who had weighed more than 226.5 lb. at their greatest (17.8% versus 5.3%), which is supported by association studies outlining the risk of MI based on obesity<sup>21-24</sup>. For those who weighed more than 226.5 lb. at their greatest, total household income of less than \$130,918 at 65 years old lead to an MI prevalence of 22.6% compared to 0.0% among those with a total household income greater than \$130,918 (Figure 1). This suggests that making a higher salary confers a protective effect against MI. However, previous studies looking at socioeconomic factors such as income, education, and occupation have found mixed results<sup>25-27</sup>, with lower income as an MI risk factor in developed countries versus the opposite effect in less developed countries<sup>28</sup>. Furthermore, income seems to interact with education, such that those with more education and lower income have a higher risk for MI, while those with more education and higher income are protected from MI<sup>28</sup>. In the U.S., lower income has been strongly associated with all-cause mortality and the disparity has gotten worse over time, specifically for men<sup>29</sup>, and is stronger in younger men than in older men<sup>27</sup>. Recent declines in coronary heart disease (CHD) deaths in the U.S. are more prominent

for those in the upper income groups than in the lower income groups, although this trend has changed over the past century, such that the more affluent used to be at a greater risk for CHD whereas now the less affluent are at a greater risk<sup>27</sup>. In addition, it has been shown that those experiencing lower socioeconomic status in childhood are more likely to suffer MI later in life<sup>27</sup>, although mixed results have been reported. Survival after MI is greatest among those in the highest income groups, but those in lower income groups are also more likely to smoke, get less physical exercise, and to drink alcohol [excessively or less than one day/week]<sup>25</sup>. Even after taking into account all of the confounding factors associated with MI, income does exhibit an inverse association with all-cause mortality, as well as cardiovascular and MI risk across most studies, suggesting that it is in-fact an independent risk factor for MI.

For men with a lower income, MI prevalence increased among those with a C:C or G:G genotype at the IL6 gene polymorphism (rs1800795) site. Those with a homozygous genotype at this locus showed a 6.2-fold increase in MI prevalence over those with the heterozygous C:G genotype (32.6% versus 5.3%, respectively). However, the results from previous studies are mixed, with some studies demonstrating an association between this polymorphism site and increased cardiovascular risk and others finding no association at all<sup>30-34</sup>, therefore additional study is necessary in order to determine what, if any, associations exist between this IL6 gene polymorphism and MI. For men who had high cholesterol by 65 years, smoked less than 22.5 years, and had diabetes by 65 years old, whether one agreed that family worries distracted them from work at 65 years old became an important MI associated factor, demonstrating a 7.4-fold increase in prevalence among those who either strongly agreed or did not agree over those who agreed that family worries distracted from work (39.3% versus 5.3%). Work- and family-related stress has been shown to increase men's risk of MI in prior studies<sup>35 36</sup>; however, here it seems that having distractions at work actually decreased MI prevalence. Kubzansky et al.<sup>37</sup> suggest that only worry in specific 'domains' increases one's MI and CHD risk, while other types of worrying can be considered a constructive problem-solving strategy. The conflicting results here suggest that the 'strongly agreed' outcome is likely an artifact of the way the data was collected and analyzed, and there may be additional interactive effect(s) that we have not illuminated to explain these mixed results. Additional study is needed before conclusions can be drawn concerning this data.

Among the group who did not agree that family worries distracted from work, MI prevalence increased to 53.3% among those who completed less than 5.5 years of college by 54 years old, with no prevalence (0.0%) among those completing more than 5.5 years. Similar to the associations linking income and MI, it has long been acknowledged that education is inversely associated with all-cause mortality including MI across many different countries<sup>25 38-40</sup>, and as was found for income the disparity has increased over time, specifically among younger men<sup>27</sup>. For those who have had a MI, less education is associated with increased risk of death and



recurrence of MI<sup>25</sup>. Furthermore, declines in CHD and MI deaths over the past few decades are least evident among those in the lowest SES groups, although again as was found for income these associations are strongest in high-income countries<sup>41 42</sup>, and can even be reversed in less developed countries<sup>28</sup>. As stated above, one study showed that education interacts with income such that more education only provides a protective effect against MI if a person also has a higher income<sup>28</sup>. Nevertheless, education has been found to be an independent predictor of MI, regardless of other known risk factors<sup>43</sup>. Surprisingly, in this study years of college education represented the largest gap in prevalence among men who ever had a MI before age 72 (53.3% versus 0.0%; Figure 1). Despite having high cholesterol and diabetes by 65 years old, 2 of the 4 conventional risk factors for MI, men in this group having completed more than 5.5 years of college experienced no MI in the WLS cohort.

#### References:

1. Anand SS, Islam S, Rosengren A, et al. Risk factors for myocardial infarction in women and men: insights from the INTERHEART study. *European Heart Journal* 2008;**29**(7):932-40.
2. Yusuf S, Hawken S, Ounpuu S, et al. Effect of potentially modifiable risk factors associated with myocardial infarction in 52 countries (the INTERHEART study): case-control study. *Lancet* 2004;**364**(9438):937-52.
3. Wang JC, Bennett M. Aging and Atherosclerosis: Mechanisms, Functional Consequences, and Potential Therapeutics for Cellular Senescence. *Circulation Research* 2012;**111**(2):245-59.
4. O'Leary DH, Polak JF, Kronmal RA, et al. Carotid-Artery Intima and Media Thickness as a Risk Factor for Myocardial Infarction and Stroke in Older Adults. *New England Journal of Medicine* 1999;**340**(1):14-22.
5. Bots ML, Hoes AW, Koudstaal PJ, et al. Common Carotid Intima-Media Thickness and Risk of Stroke and Myocardial Infarction: The Rotterdam Study. *Circulation* 1997;**96**(5):1432-37.
6. Lee HB, Offidani E, Ziegelstein RC, et al. Five-Factor Model Personality Traits as Predictors of Incident Coronary Heart Disease in the Community: A 10.5-Year Cohort Study Based on the Baltimore Epidemiologic Catchment Area Follow-Up Study. *Psychosomatics* 2014;**55**(4):352-61.
7. Taylor MD, Whiteman MC, Fowkes GR, et al. Five Factor Model personality traits and all-cause mortality in the Edinburgh Artery Study cohort. *Psychosom Med* 2009;**71**(6):631-41.
8. Jonassaint CR, Boyle SH, Williams RB, et al. Facets of openness predict mortality in patients with cardiac disease. *Psychosom Med* 2007;**69**(4):319-22.
9. Jia EZ, Xu ZX, Guo CY, et al. Renin-angiotensin-aldosterone system gene polymorphisms and coronary artery disease: detection of gene-gene and gene-environment interactions. *Cell Physiol Biochem* 2012;**29**(3-4):443-52.
10. Oki K, Yamane K, Satoh K, et al. Aldosterone synthase (CYP11B2) C-344T polymorphism affects the association of age-related changes of the serum C-reactive protein. *Hypertens Res* 2010;**33**(4):326-30.
11. Kumar NN, Benjafiel AV, Lin RCY, et al. Haplotype analysis of aldosterone synthase gene (CYP11B2) polymorphisms shows association with essential hypertension. *Journal of Hypertension* 2003;**21**(7).

12. Tsukada K, Ishimitsu T, Teranishi M, et al. Positive association of CYP11B2 gene polymorphism with genetic predisposition to essential hypertension. *J Hum Hypertens* 2002;**16**(11):789-93.
13. Tamaki S, Iwai N, Tsujita Y, et al. Genetic Polymorphism of CYP11B2 Gene and Hypertension in Japanese. *Hypertension* 1999;**33**(1):266-70.
14. Borzyszkowska J, Stanislawska-Sachadyn A, Wirtwein M, et al. Angiotensin converting enzyme gene polymorphism is associated with severity of coronary artery disease in men with high total cholesterol levels. *J Appl Genet* 2012;**53**(2):175-82.
15. Mishra A, Srivastava A, Mittal T, et al. Impact of renin-angiotensin-aldosterone system gene polymorphisms on left ventricular dysfunction in coronary artery disease patients. *Dis Markers* 2012;**32**(1):33-41.
16. Sookoian S, Gianotti TF, Gonzalez CD, et al. Association of the C-344T aldosterone synthase gene variant with essential hypertension: a meta-analysis. *J Hypertens* 2007;**25**(1):5-13.
17. Davies E, Kenyon CJ. CYP11B2 polymorphisms and cardiovascular risk factors. *Journal of Hypertension* 2003;**21**(7).
18. Patel S, Steeds R, Channer K, et al. Analysis of promoter region polymorphism in the aldosterone synthase gene (CYP11B2) as a risk factor for myocardial infarction. *American Journal of Hypertension* 2000;**13**(2):134-39.
19. Hautanen A, Toivanen P, Mänttari M, et al. Joint Effects of an Aldosterone Synthase (CYP11B2) Gene Polymorphism and Classic Risk Factors on Risk of Myocardial Infarction. *Circulation* 1999;**100**(22):2213-18.
20. Kwak JH, Paik JK, Kim OY, et al. FADS gene polymorphisms in Koreans: association with omega6 polyunsaturated fatty acids in serum phospholipids, lipid peroxides, and coronary artery disease. *Atherosclerosis* 2011;**214**(1):94-100.
21. Thomsen M, Nordestgaard BG. Myocardial infarction and ischemic heart disease in overweight and obesity with and without metabolic syndrome. *JAMA Intern Med* 2014;**174**(1):15-22.
22. Després J-P. Body Fat Distribution and Risk of Cardiovascular Disease: An Update. *Circulation* 2012;**126**(10):1301-13.
23. Logue J, Murray HM, Welsh P, et al. Obesity is associated with fatal coronary heart disease independently of traditional risk factors and deprivation. *Heart* 2011;**97**(7):564-8.
24. Yusuf S, Hawken S, Ounpuu S, et al. Obesity and the risk of myocardial infarction in 27,000 participants from 52 countries: a case-control study. *Lancet* 2005;**366**(9497):1640-9.
25. Coady S, Johnson N, Hakes J, et al. Individual education, area income, and mortality and recurrence of myocardial infarction in a Medicare cohort: the National Longitudinal Mortality Study. *BMC Public Health* 2014;**14**(1):1-11.
26. Ismail J, Jafar TH, Jafary FH, et al. Risk factors for non-fatal myocardial infarction in young South Asian adults. *Heart* 2004;**90**(3):259-63.
27. Kaplan GA, Keil JE. Socioeconomic factors and cardiovascular disease: a review of the literature. *Circulation* 1993;**88**(4 Pt 1):1973-98.
28. Piegas LS, Avezum Á, Pereira JCR, et al. Risk factors for myocardial infarction in Brazil. *American Heart Journal* 2003;**146**(2):331-38.
29. Lynch JW, Kaplan GA, Cohen RD, et al. Do Cardiovascular Risk Factors Explain the Relation between Socioeconomic Status, Risk of All-Cause Mortality, Cardiovascular Mortality, and Acute Myocardial Infarction? *American Journal of Epidemiology* 1996;**144**(10):934-42.
30. Gigante B, Bennet AM, Leander K, et al. The interaction between coagulation factor 2 receptor and interleukin 6 haplotypes increases the risk of myocardial infarction in men. *PLoS One* 2010;**5**(6):e11300.
31. Bis JC, Heckbert SR, Smith NL, et al. Variation in inflammation-related genes and risk of incident nonfatal myocardial infarction or ischemic stroke. *Atherosclerosis* 2008;**198**(1):166-73.

32. Liu Y, Berthier-Schaad Y, Fallin MD, et al. IL-6 Haplotypes, Inflammation, and Risk for Cardiovascular Disease in a Multiethnic Dialysis Cohort. *Journal of the American Society of Nephrology* 2006;**17**(3):863-70.
33. Rosner S, Ridker P, Zee RL, et al. Interaction between inflammation-related gene polymorphisms and cigarette smoking on the risk of myocardial infarction in the Physician's Health Study. *Human Genetics* 2005;**118**(2):287-94.
34. Bennet AM, Prince JA, Fei G-Z, et al. Interleukin-6 serum levels and genotypes influence the risk for myocardial infarction. *Atherosclerosis* 2003;**171**(2):359-67.
35. Gafarov VV, Gromova EA, Gafarova AV, et al. [Myocardial infarction and stress at work place and in the family: 10-year risk of development in an open population of 2564 year old men (epidemiological study in a framework of the WHO program MONICA-PSYCHOSOCIAL)]. *Kardiologija* 2011;**51**(3):10-6.
36. Rosengren A, Hawken S, Ôunpuu S, et al. Association of psychosocial risk factors with risk of acute myocardial infarction in 11 119 cases and 13 648 controls from 52 countries (the INTERHEART study): case-control study. *The Lancet* 2004;**364**(9438):953-62.
37. Kubzansky LD, Kawachi I, Spiro A, et al. Is Worrying Bad for Your Heart?: A Prospective Study of Worry and Coronary Heart Disease in the Normative Aging Study. *Circulation* 1997;**95**(4):818-24.
38. Iglund J, Vollset SE, Nygård OK, et al. Educational inequalities in acute myocardial infarction incidence in Norway: a nationwide cohort study. *PLoS One* 2014;**9**(9):e106898.
39. Guo J, Li W, Wang Y, et al. Influence of socioeconomic status on acute myocardial infarction in the Chinese population: the INTERHEART China study. *Chin Med J (Engl)* 2012;**125**(23):4214-20.
40. Hu B, Li W, Wang X, et al. Marital Status, Education, and Risk of Acute Myocardial Infarction in Mainland China: The INTER-HEART Study. *Journal of Epidemiology* 2012;**22**(2):123-29.
41. Manrique-Garcia E, Sidorchuk A, Hallqvist J, et al. Socioeconomic position and incidence of acute myocardial infarction: a meta-analysis. *Journal of Epidemiology and Community Health* 2011;**65**(4):301-09.
42. Rosengren A, Subramanian SV, Islam S, et al. Education and risk for acute myocardial infarction in 52 high, middle and low-income countries: INTERHEART case-control study. *Heart. England*, 2009:2014-22.
43. Qureshi AI, Suri MF, Saad M, et al. Educational attainment and risk of stroke and myocardial infarction. *Med Sci Monit. Poland*, 2003:CR466-73.

**Supplemental Information 9:** Additional discussion of recursive partitioning results for females who ever had a MI before age 72 in the WLS cohort.

Using recursive partitioning (RP), this study found that the most important interactive effects among factors associated with MI in females who ever had a MI by 72 years old was first having diabetes by 65 years old (see Figure 3). For those who did not have diabetes by 65, the next most important factor was having high blood pressure by 65, with a 2.7-fold increase in prevalence among those women who did have high blood pressure by 65 (7.6% versus 2.8%), followed by how often one engaged in light physical activity with others when about 67 years old (asked at 72 years) for those who did not have high blood pressure by 65. For those who engaged in light physical activity with others often, prevalence decreased from 2.8% to 0.2%, with MI nearly disappearing among this group in the WLS cohort. However, for those who engaged in light physical activity with others rarely or never when about 67, prevalence increased from 2.8% to 3.7%, demonstrating an 18.5-fold increase over those who engaged in light activity often (Figure 3). This result supports what is already understood about the effect of physical inactivity on MI risk (see main text). For those who did have high blood pressure by 65 years old, important interactions included the number of years one had smoked by 54 and whether one blames themselves when stressed (at 72 years old). For women, diabetes, high blood pressure, and smoking all act to increase one's MI risk, which (as in men) represent 3 of the 4 key or conventional risk factors for MI<sup>1-6</sup>. Smoking more than 24.5 years by 54 years old increased the prevalence of MI by 3.3-fold within this group (16.6% versus 5.1%; see Figure 3). Additionally, those who blamed themselves a medium amount or a lot when stressed showed a 4.4-fold increase in MI prevalence over those who blamed themselves only a little bit or not at all (11.8% versus 2.7%; Figure 3). This factor represents (a facet of) one's coping strategy and it has been shown in prior studies that an unhealthy coping strategy, such as blaming oneself when under stress can lead to an increase in overall ill-health, as well as increased risk for MI<sup>7,8</sup>. Blaming oneself when under stress<sup>9,10</sup> has also been linked to depression, which is associated with increased MI risk, and one's general state of mind after MI can affect post-MI risk for recurrent MI or death<sup>11-16</sup>. The largest gap in prevalence was seen between those who reported engaging in light physical activity with others often versus those who reported rarely or never; although, this factor was associated with lower MI prevalence than the above listed factors. Furthermore, only women diagnosed with diabetes by 65 years old had a MI prevalence higher than that demonstrated among men in the WLS cohort. And even considering interactions among all other factors in the RP tree, no other group of women who ever had a MI by 72 years old (nodes in the tree) reached the prevalence achieved by those who had diabetes by 65 years old. This suggests that diabetes truly is the single most important factor associated with MI for women in the WLS, and points to this as a potentially important predictor for whether a woman will have a MI in her lifetime.

## References:

1. González-Pacheco H, Vargas-Barron J, Vallejo M, et al. Prevalence of conventional risk factors and lipid profiles in patients with acute coronary syndrome and significant coronary disease. *Ther Clin Risk Manag* 2014;**10**:815-23.
2. Stone NJ, Robinson JG, Lichtenstein AH, et al. 2013 ACC/AHA Guideline on the Treatment of Blood Cholesterol to Reduce Atherosclerotic Cardiovascular Risk in Adults: A Report of the American College of Cardiology/American Heart Association Task Force on Practice Guidelines. *Circulation* 2014;**129**(25 suppl 2):S1-S45.
3. Langsted A, Freiberg JJ, Tybjaerg-Hansen A, et al. Nonfasting cholesterol and triglycerides and association with risk of myocardial infarction and total mortality: the Copenhagen City Heart Study with 31 years of follow-up. *J Intern Med* 2011;**270**(1):65-75.
4. Yusuf S, Hawken S, Ounpuu S, et al. Effect of potentially modifiable risk factors associated with myocardial infarction in 52 countries (the INTERHEART study): case-control study. *Lancet* 2004;**364**(9438):937-52.
5. Khot UN, Khot MB, Bajzer CT, et al. Prevalence of conventional risk factors in patients with coronary heart disease. *Jama* 2003;**290**(7):898-904.
6. Magnus P, Beaglehole R. The real contribution of the major risk factors to the coronary epidemics: time to end the "only-50%" myth. *Arch Intern Med* 2001;**161**(22):2657-60.
7. Roohafza H, Talaei M, Pourmoghaddas Z, et al. Association of social support and coping strategies with acute coronary syndrome: A case-control study. *Journal of Cardiology* 2012;**59**(2):154-59.
8. Penley J, Tomaka J, Wiebe J. The Association of Coping to Physical and Psychological Health Outcomes: A Meta-Analytic Review. *Journal of Behavioral Medicine* 2002;**25**(6):551-603.
9. Garnefski N, Kraaij V, Spinhoven P. Negative life events, cognitive emotion regulation and emotional problems. *Personality and Individual Differences* 2001;**30**(8):1311-27.
10. Anderson CA, Miller RS, Riger AL, et al. Behavioral and characterological attributional styles as predictors of depression and loneliness: review, refinement, and test. *J Pers Soc Psychol* 1994;**66**(3):549-58.
11. Bennett KK, Howarter AD, Clark JM. Self-blame attributions, control appraisals and distress among cardiac rehabilitation patients. *Psychol Health* 2013;**28**(6):637-52.
12. Arnold SV, Smolderen KG, Buchanan DM, et al. Perceived stress in myocardial infarction: long-term mortality and health status outcomes. *J Am Coll Cardiol* 2012;**60**(18):1756-63.
13. Garnefski N, Kraaij V, Schroevers MJ, et al. Post-traumatic growth after a myocardial infarction: a matter of personality, psychological health, or cognitive coping? *J Clin Psychol Med Settings* 2008;**15**(4):270-7.
14. Frasure-Smith N, Lesperance F. Depression and other psychological risks following myocardial infarction. *Arch Gen Psychiatry*. United States, 2003:627-36.
15. Welin C, Lappas G, Wilhelmsen L. Independent importance of psychosocial factors for prognosis after myocardial infarction. *J Intern Med*. England, 2000:629-39.
16. Affleck G, Tennen H, Croog S, et al. Causal attribution, perceived benefits, and morbidity after a heart attack: an 8-year study. *J Consult Clin Psychol* 1987;**55**(1):29-35.

**Supplemental Information 10:** Additional discussion of recursive partitioning results for females who had a MI between 65-72 years of age in the WLS cohort.

Using recursive partitioning (RP), this study found that the most important interactive effects among factors associated with MI in females between 65-72 years of age was first having diabetes by 65 years old (see Figure 4), with a 3.9-fold increase in MI incidence among those with diabetes by 65 years (7.8% versus 2.0%), suggesting that this is the most important MI associated factor for women in the WLS. For those who did have diabetes by 65, the next most important factor was their summary score for agreeableness at 65 years, and then whether they had menstruated in the last 12 months at 54 years old. Those women who had an agreeableness score  $< 32.5$  at 65 had a 10.9% MI incidence rate, while those whose agreeableness score was  $\geq 32.5$  at 65 years reported no MIs (0.0% incidence; Figure 4), which is supported by previous studies in which agreeableness was shown to have an inverse relationship with CHD risk<sup>1,2</sup>. Among those women whose agreeableness score was  $< 32.5$  at 65 years old, MI incidence increased further for those who had not menstruated in the last 12 months at 54 to 14.0%, while those who had menstruated in the last 12 months at 54 saw incidence once again drop to 0.0% (Figure 4). Therefore, even for those women who were diagnosed with diabetes by 65, the top factor associated with MI for women in the WLS cohort, and who reported a lower agreeableness score at 65, still having their menstrual cycle at 53 years old seems to have provided a protective effect against MI. Further research is needed to confirm this finding, but prior research on hormonal imbalance due to menopause and MI risk in women lends support<sup>3-10</sup>. Among those women who did not have diabetes by 65 years old, the factors that interacted to affect MI incidence were IQ, genotype for the Inhibin Beta B gene, and whether her work required physical effort at 54 years old. Women with an IQ  $< 112.5$  had an incidence rate 4.0-fold higher than women with an IQ  $\geq 112.5$ , although incidence was relatively low among both of these groups (2.4% versus 0.6%; Figure 4). Prior studies have shown that IQ relates to CVD, CHD, and all-cause mortality, however there are mixed results in the literature suggesting the association is linked with socioeconomic status in adulthood and other known risk factors<sup>11-15</sup>. For those with a higher IQ ( $\geq 112.5$ ), having a G:A or G:G genotype for the Inhibin Beta B gene polymorphism (rs11902591 SNP) resulted in an increased MI incidence of 4.7% compared to no incidence (0.0%) among those with the A:A genotype at this polymorphism site. This suggests that the A:A genotype confers a protective effect against MI, or at least that the G allele may leave someone at risk. However, there are no prior studies linking MI to the Inhibin Beta B gene, therefore further investigation is necessary. For those women carrying the G allele at the Inhibin Beta B polymorphism site, whether her work required physical effort at 54 years mediated the (above) proposed effect (Figure 4). Incidence among those women whose work required physical effort frequently was 25%, while those whose work required physical effort always, sometimes, rarely or never reported no MIs (0.0%

incidence). Although previous research has supported an association between physical activity and MI, this result may be an artifact of the way the data was collected (ie. survey) and how participants chose to answer the question. Sedentary behavior has been shown to increase one's risk of all-cause mortality, including CVD and CHD mortality and incidence, specifically when one is sedentary in their occupation as well as at home<sup>16-20</sup>. However, it has been suggested that physical activity in the workplace does not have the same effect as physical leisure activity when it comes to MI, and may in fact increase one's risk of MI if the occupational activity is highly strenuous or repetitive<sup>21-25</sup>; therefore, further study is warranted.

Among those women who did not have diabetes but had a lower IQ (< 112.5), one's summary score for extraversion at 54 years, how many hours/month she engaged in light physical activities alone at 65, how many alcoholic drinks she consumed per month at 65, body mass index at 65, genotype for the A2M gene polymorphism, how often she worked under the pressure of time at 54, and the age at which she last menstruated (reported at 65 years old) become important interactions associated with MI (see Figure 4). Each of the aforementioned factors interacted with its preceding factor to either increase MI incidence, or drop it down to zero (or nearly zero), suggesting a potential protective effect against MI. For women whose summary score for extraversion at 54 years was  $\geq 17.5$ , incidence was 2.8%, while for those whose summary score for extraversion was < 17.5, incidence was 0.0%. Although our study demonstrated a positive relationship between extraversion and MI, results produced by previous studies suggest a negative association<sup>26</sup>, therefore more study is needed. Among those women who demonstrated a higher score for extraversion, MI incidence increased to 3.0% among those who engaged in light physical activities alone  $\geq 11$  hours/month at 65, a 7.5-fold increase over those who engaged in light physical activities alone < 11 hours/month at 65 (0.4% incidence). However, it is widely agreed that more physical leisure activity reduces one's MI risk, and runs counter to the results produced by this study's analysis of women who ever had a MI by 72 (see Figure 3) in which those women who often engaged in light physical activities with others when  $\sim 67$  years old (asked at 72) showed a reduced incidence of MI compared to those who engaged in these activities rarely or never. Therefore we suggest that there may be an effect of women feeling they participated in activities 'alone' versus 'with others' during this time period in their lives, as it has been shown that a woman's MI risk is increased when she feels she lacks a strong social support or a strong social network<sup>27 28</sup>, but this remains an anomaly amongst our results. For women who drank < 20.5 alcoholic drinks/month at 65 years, MI incidence was increased to 3.6%, while dropping to 0.0% among those who drank  $\geq 20.5$  alcoholic drinks/month at 65, once again supporting that regular, moderate alcohol consumption helps protect against MI. A body mass index of  $\geq 22.5$  at 65 years interacted to increase MI incidence among women to 4.3%, while a body mass index < 22.5 at 65 years resulted in an incidence of 0.0% (Figure 4). Body mass index interacted with a

woman's genotype for the A2M gene polymorphism (rs669 SNP) site, such that those with a G:A or G:G genotype experienced an increase in MI incidence to 5.9%, an 8.4-fold increase over those with the A:A genotype (0.7% incidence). However, there are no prior studies linking MI to the A2M gene, therefore further study concerning this association is warranted. One's genotype at the A2M gene polymorphism interacted with how often a woman worked under the pressure of time at 54 years old, such that those who did always, sometimes, rarely, or never showed a MI incidence of 9.4%, while those who worked under the pressure of time frequently at 54 years experienced no MIs (0.0% incidence; Figure 4). Working under the pressure of time has not specifically been associated with MI in prior studies; however, other types of job stress have been linked to increased MI<sup>29-33</sup>. Unfortunately, the results from the current study are unclear about whether the identified association is positive or negative, and again may be an artifact of the way the data was collected and how participants chose to answer the question; therefore, additional study is necessary. Finally, working under the pressure of time interacted with the age at which a woman last menstruated, such that those who had last menstruated at < 50.5 years (reported at 65 years old) showed a MI incidence of 13.8%, while those who last menstruated at ≥ 50.5 years of age had no MIs (0.0%) by 72 years old. This result is supported by previous studies (concerning hormonal imbalance, as described in main text) and by other results in this study, for example, whether a woman had not menstruated in the last 12 months at 54 years old (14% incidence; see above). This finding lends support to the assertion that a woman's MI risk increases inversely to the age at which she stops menstruating, at which time her hormonal levels become out of balance. It seems that for women, the state of her hormonal balance in her younger years (< 65) becomes a stronger factor for MI as she ages and may affect who experiences a MI in their later years (between 65-72 years old). Each of the interactions listed above was associated with either an increased MI incidence or no incidence, suggesting that these are critical (interactive) factors for MI among women between 65-72 years old in the WLS cohort. Even among those women who appeared in the 'riskier' group for each factor listed, the next factor could interact to drop MI incidence down to 0.0% (or close to zero) for these women (Figure 4).

## References:

1. Sutin AR, Scuteri A, Lakatta EG, et al. Trait antagonism and the progression of arterial thickening: women with antagonistic traits have similar carotid arterial thickness as men. *Hypertension*. United States, 2010:617-22.
2. Costa PT, Stone SV, McCrae RR, et al. Hostility, Agreeableness-Antagonism, and Coronary Heart Disease. *Holistic Medicine* 1987;**2**(3):161-67.
3. Parker WH, Feskanich D, Broder MS, et al. Long-term mortality associated with oophorectomy compared with ovarian conservation in the nurses' health study. *Obstet Gynecol*. United States, 2013:709-16.



4. Wellons M, Ouyang P, Schreiner PJ, et al. Early menopause predicts future coronary heart disease and stroke: the Multi-Ethnic Study of Atherosclerosis. *Menopause* 2012;**19**(10):1081-7.
5. Ingelsson E, Lundholm C, Johansson AL, et al. Hysterectomy and risk of cardiovascular disease: a population-based cohort study. *Eur Heart J. England*, 2011:745-50.
6. Parker WH, Broder MS, Chang E, et al. Ovarian conservation at the time of hysterectomy and long-term health outcomes in the nurses' health study. *Obstet Gynecol. United States*, 2009:1027-37.
7. Lobo RA. Surgical menopause and cardiovascular risks. *Menopause. United States*, 2007:562-6.
8. Stampfer MJ, Colditz GA, Willett WC. Menopause and Heart Disease. *Annals of the New York Academy of Sciences* 1990;**592**(1):193-203.
9. Colditz GA, Willett WC, Stampfer MJ, et al. Menopause and the risk of coronary heart disease in women. *N Engl J Med* 1987;**316**(18):1105-10.
10. Rosenberg L, Hennekens CH, Rosner B, et al. Early menopause and the risk of myocardial infarction. *Am J Obstet Gynecol. United States*, 1981:47-51.
11. Calvin CM, Deary IJ, Fenton C, et al. Intelligence in youth and all-cause-mortality: systematic review with meta-analysis. *International Journal of Epidemiology* 2011;**40**(3):626-44.
12. Batty GD, Shipley MJ, Mortensen LH, et al. IQ in late adolescence/early adulthood, risk factors in middle age and later all-cause mortality in men: the Vietnam Experience Study. *Journal of Epidemiology and Community Health* 2008;**62**(6):522-31.
13. Batty GD, Deary IJ, Gottfredson LS. Premorbid (early life) IQ and Later Mortality Risk: Systematic Review. *Annals of Epidemiology* 2007;**17**(4):278-88.
14. Hart CL, Taylor MD, Smith G, et al. Childhood IQ and all-cause mortality before and after age 65: Prospective observational study linking the Scottish Mental Survey 1932 and the Midspan studies. *British Journal of Health Psychology* 2005;**10**(2):153-65.
15. Hart CL, Taylor MD, Davey Smith G, et al. Childhood IQ, social class, deprivation, and their relationships with mortality and morbidity risk in later life: prospective observational study linking the Scottish Mental Survey 1932 and the Midspan studies. *Psychosom Med* 2003;**65**(5):877-83.
16. Biswas A, Oh PI, Faulkner GE, et al. Sedentary time and its association with risk for disease incidence, mortality, and hospitalization in adults: a systematic review and meta-analysis. *Ann Intern Med* 2015;**162**(2):123-32.
17. Mozumdar A, Liguori G, DuBose K. Occupational physical activity and risk of coronary heart disease among active and non-active working-women of North Dakota: a Go Red North Dakota Study. *Anthropol Anz* 2012;**69**(2):201-19.
18. Berlin JA, Colditz GA. A META-ANALYSIS OF PHYSICAL ACTIVITY IN THE PREVENTION OF CORONARY HEART DISEASE. *American Journal of Epidemiology* 1990;**132**(4):612-28.
19. Salonen JT, Slater JS, Tuomilehto J, et al. Leisure time and occupational physical activity: risk of death from ischemic heart disease. *Am J Epidemiol* 1988;**127**(1):87-94.
20. Salonen JT, Puska P, Tuomilehto J. Physical activity and risk of myocardial infarction, cerebral stroke and death: a longitudinal study in Eastern Finland. *Am J Epidemiol* 1982;**115**(4):526-37.
21. Holtermann A, Marott JL, Gyntelberg F, et al. Occupational and leisure time physical activity: risk of all-cause mortality and myocardial infarction in the Copenhagen City Heart Study. A prospective cohort study. *BMJ Open* 2012;**2**(1).
22. Sofi F, Capalbo A, Marcucci R, et al. Leisure time but not occupational physical activity significantly affects cardiovascular risk factors in an adult population. *Eur J Clin Invest. England*, 2007:947-53.
23. Fransson E, De Faire U, Ahlbom A, et al. The risk of acute myocardial infarction: interactions of types of physical activity. *Epidemiology. United States*, 2004:573-82.

24. Mittleman MA, Maclure M, Toftler GH, et al. Triggering of Acute Myocardial Infarction by Heavy Physical Exertion -- Protection against Triggering by Regular Exertion. *New England Journal of Medicine* 1993;**329**(23):1677-83.
25. Gyntelberg F, Lauridsen L, Schubell K. Physical fitness and risk of myocardial infarction in Copenhagen males aged 40-59: A five- and seven-year follow-up study. *Scandinavian Journal of Work, Environment & Health* 1980;**6**(3):170-78.
26. Andre-Petersson L, Schlyter M, Engstrom G, et al. Behavior in a stressful situation, personality factors, and disease severity in patients with acute myocardial infarction: baseline findings from the prospective cohort study SECAMI (the Secondary Prevention and Compliance following Acute Myocardial Infarction study). *BMC Cardiovasc Disord* 2011;**11**:45.
27. Welin C, Lappas G, Wilhelmssen L. Independent importance of psychosocial factors for prognosis after myocardial infarction. *J Intern Med.* England, 2000:629-39.
28. Brezinka V, Kittel F. Psychosocial factors of coronary heart disease in women: a review. *Soc Sci Med* 1996;**42**(10):1351-65.
29. Moller J, Theorell T, de Faire U, et al. Work related stressful life events and the risk of myocardial infarction. Case-control and case-crossover analyses within the Stockholm heart epidemiology programme (SHEEP). *J Epidemiol Community Health.* England, 2005:23-30.
30. Liu Y, Tanaka H. Overtime work, insufficient sleep, and risk of non-fatal acute myocardial infarction in Japanese men. *Occupational and Environmental Medicine* 2002;**59**(7):447-51.
31. Yoshimasu K. Relation of type A behavior pattern and job-related psychosocial factors to nonfatal myocardial infarction: a case-control study of Japanese male workers and women. *Psychosom Med* 2001;**63**(5):797-804.
32. Welin C, Rosengren A, Wedel H, et al. Myocardial infarction in relation to work, family and life events. *Cardiovascular Risk Factors* 1995;**5**(1):30-38.
33. Karasek RA, Theorell T, Schwartz JE, et al. Job characteristics in relation to the prevalence of myocardial infarction in the US Health Examination Survey (HES) and the Health and Nutrition Examination Survey (HANES). *American Journal of Public Health* 1988;**78**(8):910-18.

STROBE Statement—checklist of items that should be included in reports of observational studies

|                              | <b>Item No.</b> | <b>Recommendation</b>                                                                                                                                                                                                                                                                                                                                                                                                                                                  | <b>Reported on Page #</b> |
|------------------------------|-----------------|------------------------------------------------------------------------------------------------------------------------------------------------------------------------------------------------------------------------------------------------------------------------------------------------------------------------------------------------------------------------------------------------------------------------------------------------------------------------|---------------------------|
| <b>Title and abstract</b>    | 1               | (a) Indicate the study's design with a commonly used term in the title or the abstract                                                                                                                                                                                                                                                                                                                                                                                 | 1                         |
|                              |                 | (b) Provide in the abstract an informative and balanced summary of what was done and what was found                                                                                                                                                                                                                                                                                                                                                                    | 2                         |
| <b>Introduction</b>          |                 |                                                                                                                                                                                                                                                                                                                                                                                                                                                                        |                           |
| Background/rationale         | 2               | Explain the scientific background and rationale for the investigation being reported                                                                                                                                                                                                                                                                                                                                                                                   | 4                         |
| Objectives                   | 3               | State specific objectives, including any prespecified hypotheses                                                                                                                                                                                                                                                                                                                                                                                                       | 4                         |
| <b>Methods</b>               |                 |                                                                                                                                                                                                                                                                                                                                                                                                                                                                        |                           |
| Study design                 | 4               | Present key elements of study design early in the paper                                                                                                                                                                                                                                                                                                                                                                                                                | 5-7                       |
| Setting                      | 5               | Describe the setting, locations, and relevant dates, including periods of recruitment, exposure, follow-up, and data collection                                                                                                                                                                                                                                                                                                                                        | 5-7                       |
| Participants                 | 6               | (a) <i>Cohort study</i> —Give the eligibility criteria, and the sources and methods of selection of participants. Describe methods of follow-up<br><i>Case-control study</i> —Give the eligibility criteria, and the sources and methods of case ascertainment and control selection. Give the rationale for the choice of cases and controls<br><i>Cross-sectional study</i> —Give the eligibility criteria, and the sources and methods of selection of participants | 5                         |
|                              |                 | (b) <i>Cohort study</i> —For matched studies, give matching criteria and number of exposed and unexposed<br><i>Case-control study</i> —For matched studies, give matching criteria and the number of controls per case                                                                                                                                                                                                                                                 | NA                        |
| Variables                    | 7               | Clearly define all outcomes, exposures, predictors, potential confounders, and effect modifiers. Give diagnostic criteria, if applicable                                                                                                                                                                                                                                                                                                                               | 5-7                       |
| Data sources/<br>measurement | 8*              | For each variable of interest, give sources of data and details of methods of assessment (measurement). Describe comparability of assessment methods if there is more than one group                                                                                                                                                                                                                                                                                   | 5-7                       |
| Bias                         | 9               | Describe any efforts to address potential sources of bias                                                                                                                                                                                                                                                                                                                                                                                                              | 8-9                       |
| Study size                   | 10              | Explain how the study size was arrived at                                                                                                                                                                                                                                                                                                                                                                                                                              | 6                         |

Continued on next page

|                        |     |                                                                                                                                                                                                                                                                                                           |                      |
|------------------------|-----|-----------------------------------------------------------------------------------------------------------------------------------------------------------------------------------------------------------------------------------------------------------------------------------------------------------|----------------------|
| Quantitative variables | 11  | Explain how quantitative variables were handled in the analyses. If applicable, describe which groupings were chosen and why                                                                                                                                                                              | 7-8                  |
| Statistical methods    | 12  | (a) Describe all statistical methods, including those used to control for confounding                                                                                                                                                                                                                     | 7-8                  |
|                        |     | (b) Describe any methods used to examine subgroups and interactions                                                                                                                                                                                                                                       | 7-8                  |
|                        |     | (c) Explain how missing data were addressed                                                                                                                                                                                                                                                               | 8-9                  |
|                        |     | (d) <i>Cohort study</i> —If applicable, explain how loss to follow-up was addressed<br><i>Case-control study</i> —If applicable, explain how matching of cases and controls was addressed<br><i>Cross-sectional study</i> —If applicable, describe analytical methods taking account of sampling strategy | 8-9                  |
|                        |     | (e) Describe any sensitivity analyses                                                                                                                                                                                                                                                                     | 8-9                  |
| <b>Results</b>         |     |                                                                                                                                                                                                                                                                                                           |                      |
| Participants           | 13* | (a) Report numbers of individuals at each stage of study—eg numbers potentially eligible, examined for eligibility, confirmed eligible, included in the study, completing follow-up, and analysed                                                                                                         | 5-6, 10              |
|                        |     | (b) Give reasons for non-participation at each stage                                                                                                                                                                                                                                                      | 6                    |
|                        |     | (c) Consider use of a flow diagram                                                                                                                                                                                                                                                                        | NA                   |
| Descriptive data       | 14* | (a) Give characteristics of study participants (eg demographic, clinical, social) and information on exposures and potential confounders                                                                                                                                                                  | 10, Table 1          |
|                        |     | (b) Indicate number of participants with missing data for each variable of interest                                                                                                                                                                                                                       | Supplemental Table 1 |
|                        |     | (c) <i>Cohort study</i> —Summarise follow-up time (eg, average and total amount)                                                                                                                                                                                                                          | NA                   |
| Outcome data           | 15* | <i>Cohort study</i> —Report numbers of outcome events or summary measures over time                                                                                                                                                                                                                       | Tables 2, 3          |
|                        |     | <i>Case-control study</i> —Report numbers in each exposure category, or summary measures of exposure                                                                                                                                                                                                      | Tables 2, 3          |
|                        |     | <i>Cross-sectional study</i> —Report numbers of outcome events or summary measures                                                                                                                                                                                                                        | NA                   |
| Main results           | 16  | (a) Give unadjusted estimates and, if applicable, confounder-adjusted estimates and their precision (eg, 95% confidence interval). Make clear which confounders were adjusted for and why they were included                                                                                              | 10-15                |
|                        |     | (b) Report category boundaries when continuous variables were categorized                                                                                                                                                                                                                                 | NA                   |
|                        |     | (c) If relevant, consider translating estimates of relative risk into absolute risk for a meaningful time period                                                                                                                                                                                          | NA                   |

Continued on next page

|                          |    |                                                                                                                                                                            |       |
|--------------------------|----|----------------------------------------------------------------------------------------------------------------------------------------------------------------------------|-------|
| Other analyses           | 17 | Report other analyses done—eg analyses of subgroups and interactions, and sensitivity analyses                                                                             | 10-15 |
| <b>Discussion</b>        |    |                                                                                                                                                                            |       |
| Key results              | 18 | Summarise key results with reference to study objectives                                                                                                                   | 16    |
| Limitations              | 19 | Discuss limitations of the study, taking into account sources of potential bias or imprecision. Discuss both direction and magnitude of any potential bias                 | 20-21 |
| Interpretation           | 20 | Give a cautious overall interpretation of results considering objectives, limitations, multiplicity of analyses, results from similar studies, and other relevant evidence | 21-22 |
| Generalisability         | 21 | Discuss the generalisability (external validity) of the study results                                                                                                      | 16-20 |
| <b>Other information</b> |    |                                                                                                                                                                            |       |
| Funding                  | 22 | Give the source of funding and the role of the funders for the present study and, if applicable, for the original study on which the present article is based              | 22    |

\*Give information separately for cases and controls in case-control studies and, if applicable, for exposed and unexposed groups in cohort and cross-sectional studies.

**Note:** An Explanation and Elaboration article discusses each checklist item and gives methodological background and published examples of transparent reporting. The STROBE checklist is best used in conjunction with this article (freely available on the Web sites of PLoS Medicine at <http://www.plosmedicine.org/>, Annals of Internal Medicine at <http://www.annals.org/>, and Epidemiology at <http://www.epidem.com/>). Information on the STROBE Initiative is available at [www.strobe-statement.org](http://www.strobe-statement.org).
